# Supplementary material for: First-principles study of the surface energies and electronic structures of γ-CsSnI3 surfaces
Source: Royal Society of Chemistry journal article supplement (doi:10.1039/d4cp01787k), 2024-01-01
Supplement: d4cp01787k1.pdf [file d4cp01787k1.pdf]

### Electronic supplementary information for

#### **First-principles study of the surface energies and electronic structures of $\gamma$ -CsSnI<sub>3</sub> surfaces**

Tong Zhou<sup>1</sup>, Yan-Jin Chen,<sup>1</sup> Chunju Hou<sup>2</sup>, Yi Yang,<sup>1</sup>

<sup>1</sup> College of Rare Earths and Faculty of Materials, Metallurgy and Chemistry, Jiangxi University of Science and Technology, Ganzhou, 341000, China

<sup>2</sup> School of Science, Jiangxi University of Science and Technology, Ganzhou, 341000, China

#### **Calculating the surface energies of polar surfaces**

Sn-rich condition is good for suppressing the formation of Sn-vacancy in CsSnI<sub>3</sub>, which is considered as the most detrimental defect, promoting high luminescent efficiency.<sup>1</sup> For Sn-perovskites, Sn-rich condition may be achieved by the presence of excess Sn sources such as Sn metal and SnF<sub>2</sub> additive.<sup>2,3</sup> Nakamura et al. found that Sn metal nanoparticles are produced from the reaction of a dihydropyridine derivative with SnF<sub>2</sub> (II) additive.<sup>3</sup> Assuming Sn-rich condition (i.e.,  $\Delta\mu_{\text{Sn}}=0$  eV), we obtain  $\Delta\mu_{\text{Cs}} + 3\Delta\mu_{\text{I}} = -4.720$  eV for CsSnI<sub>3</sub>. Combining Sn-rich with CsI-rich ( $\Delta\mu_{\text{Cs}} + \Delta\mu_{\text{I}} = -3.081$  eV) conditions of stable CsSnI<sub>3</sub>, we obtain:  $\Delta\mu_{\text{Cs}} = -2.261$  eV and  $\Delta\mu_{\text{I}} = -0.820$  eV. Similarly, we obtain:  $\Delta\mu_{\text{Cs}} = -2.536$  eV and  $\Delta\mu_{\text{I}} = -0.728$  eV at SnI<sub>2</sub>-rich condition ( $\Delta\mu_{\text{Cs}} + \Delta\mu_{\text{I}} = -3.264$  eV). The surface energies ( $E_{\text{surf}}$ ) of (100), (010) and (101) polar surfaces are calculated at these conditions. In particular, the  $E_{\text{surf}}$  of (101) surface, either for CsI<sub>3</sub>- or Sn-termination, only depends on  $\Delta\mu_{\text{Cs}} + 3\Delta\mu_{\text{I}}$ :

$$E_{\text{surf}}^{\text{CsI}_3} = \lambda_{\text{CsI}_3} - \frac{1}{S}(\Delta\mu_{\text{Cs}} + 3\Delta\mu_{\text{I}}) \quad (1)$$

$$E_{\text{surf}}^{\text{Sn}} = \lambda_{\text{Sn}} + \frac{1}{S}(\Delta\mu_{\text{Cs}} + 3\Delta\mu_{\text{I}}) \quad (2)$$

For Sn-rich condition, the  $E_{\text{surf}}$  of (101) surfaces can be calculated according to  $\Delta\mu_{\text{Cs}} + 3\Delta\mu_{\text{I}} = -4.720$  eV and thus is independent of CsI-rich or SnI<sub>2</sub>-rich condition.

#### **Effect of dispersion force on the structures and surface energies**

To show the effect of London dispersion force on the structures and surface energies, we use PBEsol+D3<sup>4</sup> to calculate the structural parameters of CsSnI<sub>3</sub> bulk and the surface energies of (001) surfaces. It is seen from Table S2 that the structural parameters calculated by PBEsol and PBEsol+D3 are consistent with each other and agree well with experimental values. From Table S3, one can find that the surface energies of the CsI-(001) and SnI<sub>2</sub>-(001) surfaces calculated from PBEsol+D3 are overall increased by 0.07 and 0.11 J/m<sup>2</sup>, respectively, in comparison with the values obtained from PBEsol. It is worth noting that the difference in the surface energies between SnI<sub>2</sub>-(001) and CsI-(001) surfaces increase about 0.04 J/m<sup>2</sup>, indicating that CsI-termination remains the most stable compared with SnI<sub>2</sub>-termination with the consideration of London dispersion force. Therefore, including London dispersion force in the calculations does not change the main conclusions based on PBEsol.

**Table S1** Surface energies ( $E_{\text{surf}}$ , J/m<sup>2</sup>) of the CsSnI<sub>3</sub> (001) surfaces calculated by using the cutoff values of 350 eV and 500 eV.

| $E_{\text{surf}}$       | 350 eV   |                        | 500 eV   |                        |
|-------------------------|----------|------------------------|----------|------------------------|
|                         | CsI-rich | SnI <sub>2</sub> -rich | CsI-rich | SnI <sub>2</sub> -rich |
| CsI-(001)               | 0.073    | 0.113                  | 0.071    | 0.110                  |
| SnI <sub>2</sub> -(001) | 0.196    | 0.156                  | 0.194    | 0.154                  |

**Table S2** Structural parameters of  $\gamma$ -CsSnI<sub>3</sub> calculated by using PBEsol and PBEsol+D3. Experimental (Expt.) values<sup>5</sup> are also listed here for a comparison.

|           | a (Å) | b     | c      |
|-----------|-------|-------|--------|
| PBEsol    | 8.779 | 8.344 | 12.238 |
| PBEsol+D3 | 8.525 | 8.510 | 12.225 |
| Expt.     | 8.688 | 8.643 | 12.378 |

**Table S3** Surface energies ( $E_{\text{surf}}$ , J/m<sup>2</sup>) of  $\gamma$ -CsSnI<sub>3</sub> (001) surfaces calculated by using PBEsol and PBEsol+D3.

| $E_{\text{surf}}$       | PBEsol   |                        | PBEsol+D3 |                        |
|-------------------------|----------|------------------------|-----------|------------------------|
|                         | CsI-rich | SnI <sub>2</sub> -rich | CsI-rich  | SnI <sub>2</sub> -rich |
| CsI-(001)               | 0.073    | 0.113                  | 0.141     | 0.185                  |
| SnI <sub>2</sub> -(001) | 0.196    | 0.156                  | 0.309     | 0.265                  |

**Table S4** Surface energies ( $E_{\text{surf}}$ , J/m<sup>2</sup>) of the (100), (010) and (101) polar surfaces. Assuming Sn-rich condition (i.e.,  $\Delta\mu_{\text{Sn}}=0$  eV), the  $E_{\text{surf}}$  are calculated at CsI-rich:  $\Delta\mu_{\text{Cs}} = -2.261$  eV and  $\Delta\mu_{\text{I}} = -0.820$  eV, and SnI<sub>2</sub>-rich condition:  $\Delta\mu_{\text{Cs}} = -2.536$  eV and  $\Delta\mu_{\text{I}} = -0.728$  eV.

| $E_{\text{surf}}$      | (100) |                | (010) |                | (101)            |       |
|------------------------|-------|----------------|-------|----------------|------------------|-------|
|                        | CsSnI | I <sub>2</sub> | CsSnI | I <sub>2</sub> | CsI <sub>3</sub> | Sn    |
| CsI-rich               | 0.467 | 0.312          | 0.449 | 0.312          | 0.243            | 0.418 |
| SnI <sub>2</sub> -rich | 0.496 | 0.283          | 0.477 | 0.285          | 0.243            | 0.418 |

**Table S5**  $E_{\text{surf}}$  (J/m<sup>2</sup>) of polarity-compensated (010) surface. Three terminations (Cs, SnI and I) are considered for (010) surface. The  $E_{\text{surf}}$  values are calculated at the CsI-rich ( $\Delta\mu_{\text{Cs}}+\Delta\mu_{\text{I}}=-3.081$  eV) and SnI<sub>2</sub>-rich ( $\Delta\mu_{\text{Cs}}+\Delta\mu_{\text{I}}=-3.264$  eV) conditions.

| $E_{\text{surf}}$      | (010) |       |       |
|------------------------|-------|-------|-------|
|                        | Cs    | SnI   | I     |
| CsI-rich               | 0.120 | 0.231 | 0.118 |
| SnI <sub>2</sub> -rich | 0.175 | 0.177 | 0.118 |

**Table S6**  $E_{\text{surf}}$  ( $\text{J}/\text{m}^2$ ) of the (100) and (001) surfaces of  $\text{CsSnI}_3$  and  $\text{CsPbI}_3$ . The  $E_{\text{surf}}$  of the (100) and (001) surfaces of  $\text{CsPbI}_3$  are taken from a previous study.<sup>6</sup>

|    |                        | (100) |       |       |                |       | (001) |                 |
|----|------------------------|-------|-------|-------|----------------|-------|-------|-----------------|
| M  | $E_{\text{surf}}$      | Cs    | MI    | CsMI  | I <sub>2</sub> | I     | CsI   | MI <sub>2</sub> |
| Sn | CsI-rich               | 0.119 | 0.246 | 0.467 | 0.312          | 0.118 | 0.073 | 0.196           |
|    | SnI <sub>2</sub> -rich | 0.176 | 0.189 | 0.496 | 0.283          | 0.118 | 0.113 | 0.156           |
| Pb | CsI-rich               | 0.112 | 0.252 | 0.465 | 0.532          | 0.130 | 0.069 | 0.193           |
|    | PbI <sub>2</sub> -rich | 0.137 | 0.228 | 0.477 | 0.520          | 0.130 | 0.085 | 0.177           |

**Table S7** Band gaps ( $E_g$ ) of the (110), (001), (100) and (101) surfaces of  $\text{CsSnI}_3$ . The calculated band gap of the bulk is 0.53 eV. Nine-layers slabs are used for the (110) and (001) surfaces; thirteen-layers slabs for the (100)-Cs, (100)-SnI and (100)-I surfaces; fifteen-layers for the (101)-CsI<sub>2</sub> and (101)-I\*. These choices ensure a similar thickness of about 29 Å for all these slabs. Orbital-projected band structures and the effective masses in the main text and ESI are calculated using these slabs.

| Surfaces     | (110) |                  | (001) |                  | (100) |      |      | (101)            |      |
|--------------|-------|------------------|-------|------------------|-------|------|------|------------------|------|
| Terminations | CsI   | SnI <sub>2</sub> | CsI   | SnI <sub>2</sub> | Cs    | SnI  | I    | CsI <sub>2</sub> | I*   |
| $E_g$        | 0.68  | 0.65             | 0.72  | 0.64             | 0.87  | 0.80 | 0.83 | 0.88             | 0.99 |

**Table S8** Calculated effective mass (in units of the free-electron mass  $m_0$ ) of hole ( $m_h$ ) and electron ( $m_e$ ) along  $\Gamma$ -M for the (110), (001), (100) and (101) surfaces.

| Surfaces     | (110) |                  | (001) |                  | (100) |      |      | (101)            |      |
|--------------|-------|------------------|-------|------------------|-------|------|------|------------------|------|
| Terminations | CsI   | SnI <sub>2</sub> | CsI   | SnI <sub>2</sub> | Cs    | SnI  | I    | CsI <sub>2</sub> | I*   |
| $m_h$        | 0.26  | 0.26             | 0.31  | 0.34             | 0.54  | 0.39 | 0.45 | 0.65             | 0.73 |
| $m_e$        | 0.30  | 0.74             | 0.36  | 0.41             | 0.55  | 0.97 | 0.52 | 1.06             | 2.41 |

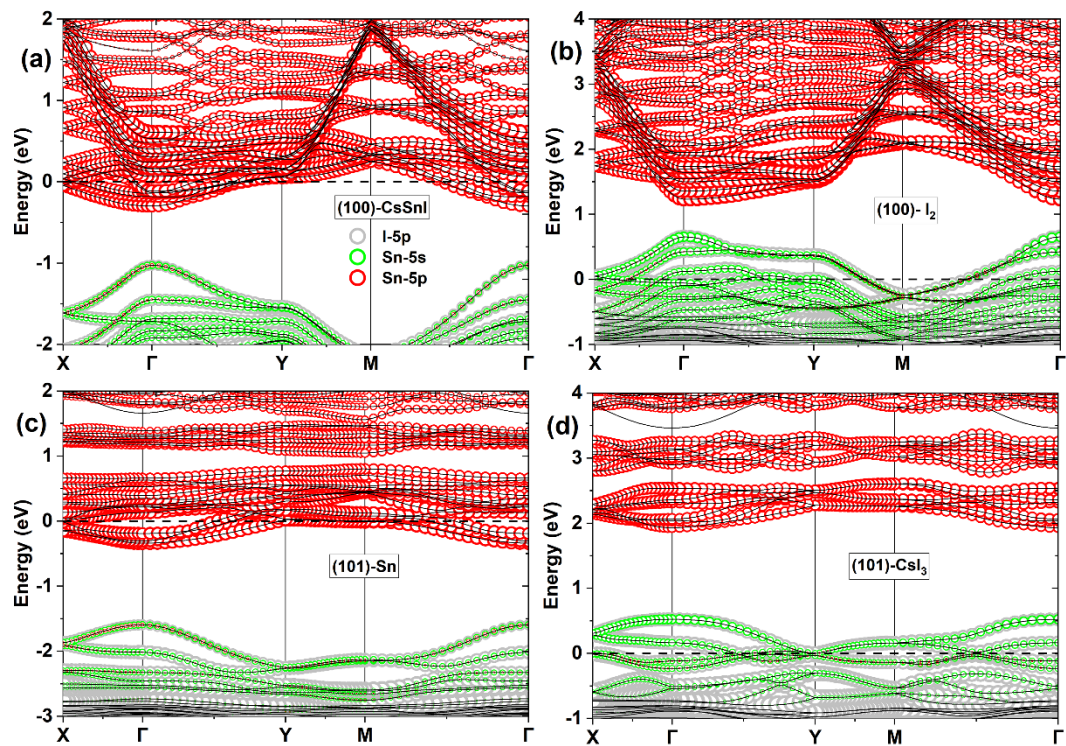

**Figure S1** Orbital-projected band structures of the CsSnI- and I<sub>2</sub>-terminated (100) surfaces, and the Sn- and CsI<sub>3</sub>-terminated (101) surfaces. The Fermi level is indicated by the horizontal dashed line.

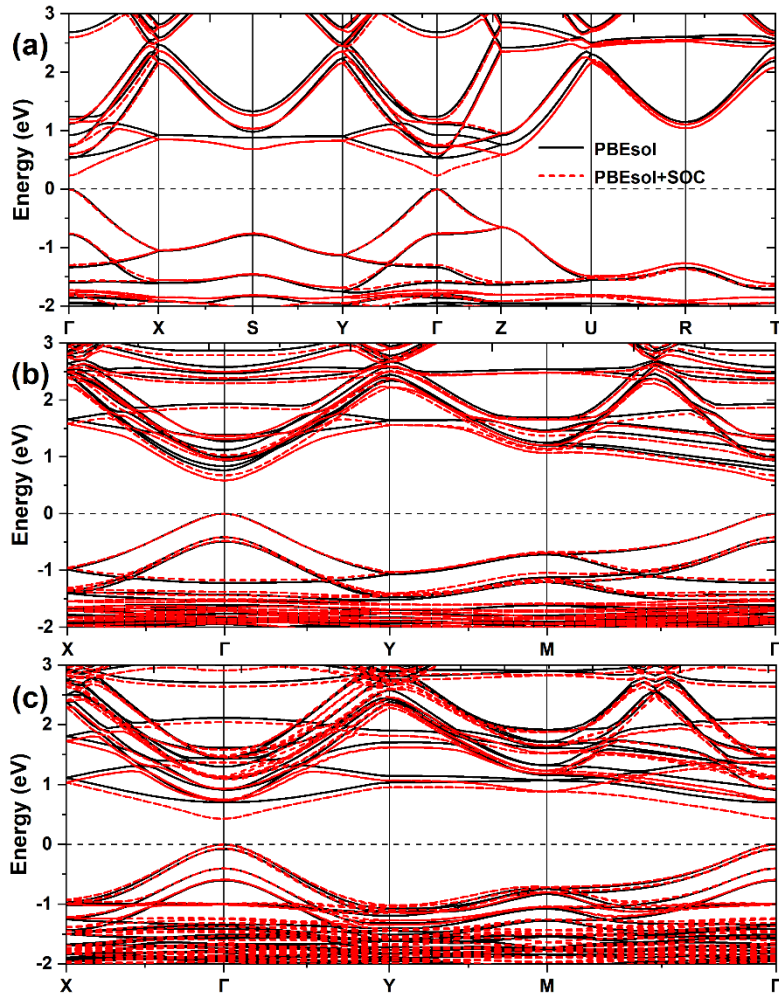

**Figure S2** Band structures calculated without (PBEsol) and with SOC (PBEsol+SOC) for: (a) the bulk; (b) CsI-(001) surface; (c) SnI<sub>2</sub>-(001) surface. The energy of the VBM is set as zero. Seven-layers slabs are used for the (001) surfaces.

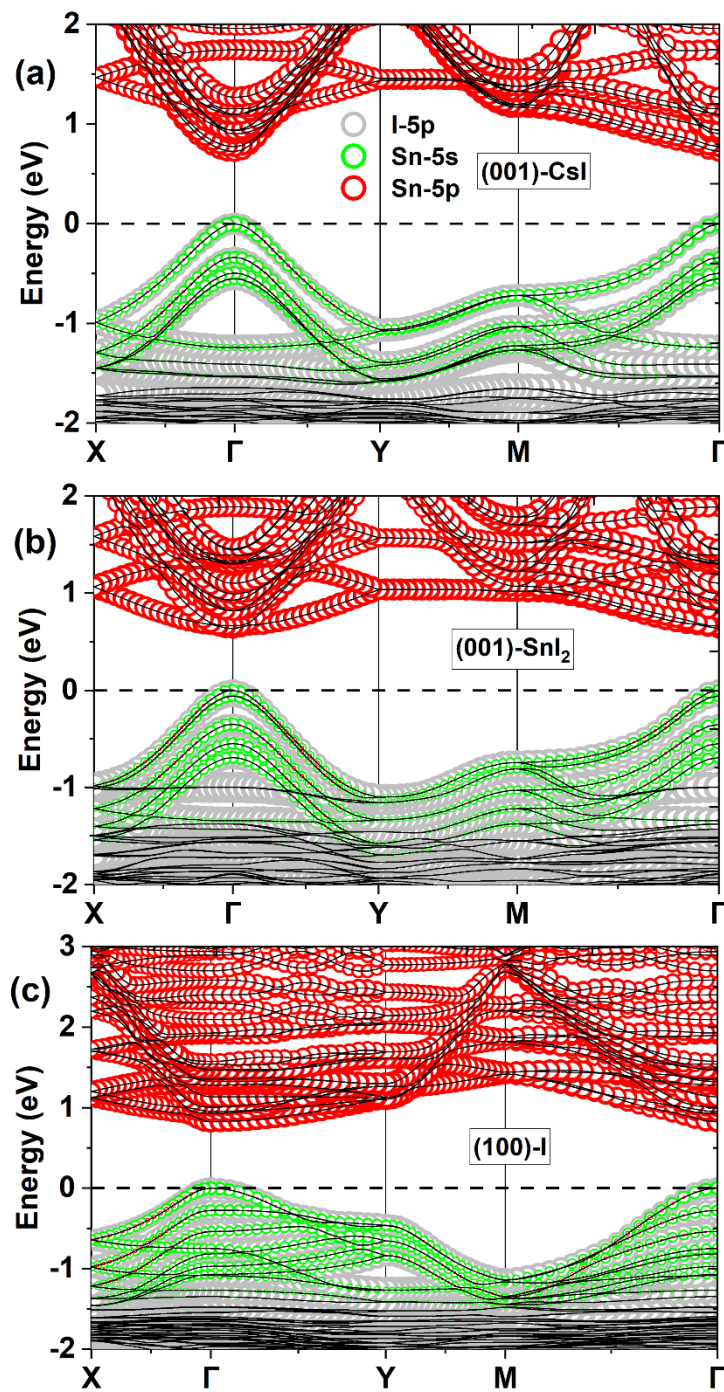

**Figure S3** Orbital-projected band structures of the (001)-CsI, (001)-SnI<sub>2</sub> and (100)-I surfaces. The energy of the VBM is set as zero.

### References

1. Q. Liu, J. Yin, B.-B. Zhang, J.-K. Chen, Y. Zhou, L.-M. Zhang, L.-M. Wang, Q. Zhao, J. Hou, J. Shu, B. Song, N. Shirahata, O. M. Bakr, O. F. Mohammed and H.-T. Sun, *J. Am. Chem. Soc.*, 2021, **143**, 5470-5480.
2. R. Lin, K. Xiao, Z. Qin, Q. Han, C. Zhang, M. Wei, M. I. Saidaminov, Y. Gao, J.

- Xu and M. Xiao, *Nature Energy*, 2019, **4**, 864-873.
3. T. Nakamura, S. Yakumaru, M. A. Truong, K. Kim, J. Liu, S. Hu, K. Otsuka, R. Hashimoto, R. Murdey, T. Sasamori, H. D. Kim, H. Ohkita, T. Handa, Y. Kanemitsu and A. Wakamiya, *Nature Commun.*, 2020, **11**, 3008.
  4. S. Grimme, J. Antony, S. Ehrlich, and S. Krieg, *J. Chem. Phys.*, 2010, **132**, 154104.
  5. K. Yamada, S. Funabiki, H. Horimoto, T. Matsui, T. Okuda, and S. Ichiba, *Chem. Lett.*, 1991, **20**, 801.
  6. Y. Yang, Y.-J. Chen, C. Hou and T.-X. Liang, *J. Phys. Chem. C*, 2022, **126**, 21155-21161.
